# Supplementary material for: Prescribed Fire Causes Wounding and Minor Tree Quality Degradation in Oak Forests
Source: MDPI journal article supplement (doi:10.3390/f14020227), 2023-01-25
Supplement: s1 [file s1]

**Table S1.** Sample size, mean and range of volume loss (in dm<sup>3</sup>) per wound for each wound type by common species. Observed volume losses of <0.05 dm<sup>3</sup> are indicated as 0.0 below; ranges are not provided for sample sizes of 1.

| Species                                          | Bark Slough |              |             | Catfaces |              | Basal Flutes |    | Ovals        |            | Seams |              |             |     |      |             |
|--------------------------------------------------|-------------|--------------|-------------|----------|--------------|--------------|----|--------------|------------|-------|--------------|-------------|-----|------|-------------|
|                                                  | n           | mean (range) |             | n        | mean (range) |              | n  | mean (range) |            | n     | mean (range) |             |     |      |             |
| White oaks                                       |             |              |             |          |              |              |    |              |            |       |              |             |     |      |             |
| White ( <i>Quercus alba</i> )                    | 548         | 3.7          | (0.0-92.0)  | 399      | 17.5         | (0.0-440.7)  | 8  | 9.8          | (0.6-38.8) | 64    | 7.9          | (0.0-55.1)  | 518 | 3.7  | (0.0-453.1) |
| Post ( <i>Q. stellata</i> )                      | 126         | 4.6          | (0.0-140.4) | 97       | 27.4         | (0.3-223.6)  | 0  | —            |            | 23    | 7.9          | (0.0-32.5)  | 65  | 12.3 | (0.0-377.6) |
| Chestnut ( <i>Q. montana</i> )                   | 38          | 3.7          | (0.0-34.1)  | 52       | 23.9         | (0.3-202.3)  | 4  | 9.3          | (1.1-32.0) | 5     | 61.5         | (1.5-294.6) | 38  | 1.3  | (0.0-5.3)   |
| Red oaks                                         |             |              |             |          |              |              |    |              |            |       |              |             |     |      |             |
| Black ( <i>Q. velutina</i> )                     | 107         | 4.0          | (0.0-89.7)  | 156      | 23.1         | (0.0-410.8)  | 4  | 26.0         | (1.5-47.1) | 30    | 7.7          | (0.6-56.5)  | 145 | 2.3  | (0.0-131.9) |
| Northern red ( <i>Q. rubra</i> )                 | 37          | 6.1          | (0.0-29.0)  | 101      | 21.7         | (0.2-274.9)  | 10 | 10.7         | (0.2-64.8) | 16    | 3.9          | (0.3-16.5)  | 77  | 5.9  | (0.0-141.6) |
| Scarlet ( <i>Q. coccinea</i> )                   | 29          | 0.9          | (0.0-27.4)  | 57       | 49.5         | (0.0-724.9)  | 0  | —            |            | 1     | 9.6          |             | 29  | 3.9  | (0.0-113.3) |
| Hickories ( <i>Carya spp.</i> ) <sup>1</sup>     | 39          | 2.9          | (0.0-22.8)  | 71       | 29.6         | (0.0-561.5)  | 1  | 3.7          |            | 19    | 11.1         | (0.1-91.8)  | 62  | 3.9  | (0.0-113.3) |
| Maples and Beeches                               |             |              |             |          |              |              |    |              |            |       |              |             |     |      |             |
| Sugar maple ( <i>Acer saccharum</i> )            | 15          | 3.1          | (0.0-18.1)  | 76       | 11.9         | (0.2-103.1)  | 5  | 4.3          | (0.8-10.2) | 22    | 8.0          | (0.1-92.0)  | 33  | 1.2  | (0.0-5.0)   |
| American beech ( <i>Fagus grandifolia</i> )      | 1           | 0.9          |             | 19       | 36.7         | (0.0-177.2)  | 1  | 7.3          |            | 8     | 4.3          | (0.2-15.2)  | 8   | 0.5  | (0.2-1.3)   |
| Red maple ( <i>A. rubrum</i> )                   | 2           | 0.0          | (0.0-0.0)   | 11       | 18.3         | (2.1-75.5)   | 0  | —            |            | 2     | 9.5          | (8.3-10.8)  | 5   | 17.0 | (0.0-85.0)  |
| Shortleaf pine ( <i>Pinus echinata</i> )         | 8           | 0.0          | (0.0-0.0)   | 5        | 8.4          | (1.0-18.0)   | 0  | —            |            | 0     | —            |             | 5   | 0.0  | (0.0-0.0)   |
| Yellow poplar ( <i>Liriodendron tulipifera</i> ) | 63          | 2.9          | (0.0-22.0)  | 18       | 64.5         | (0.2-801.3)  | 0  | —            |            | 5     | 2.6          | (0.1-9.8)   | 16  | 17.9 | (0.0-151.0) |

<sup>1</sup> Hickories were only identified to genus during most of the data collection.
